# Supplementary material for: Surface modification of carbon and metal electrodes with bistable molecular redox switches by click and amide coupling
Source: Royal Society of Chemistry journal article supplement (doi:10.1039/c5tc01655j), 2015-01-01
Supplement: c5tc01655j1.pdf [file c5tc01655j1.pdf]

## Electronic Supplementary Information

### Surface modification of carbon and metal electrodes with bistable molecular redox switches by click and amide coupling

R. T. Jane, E. Gaudemer and R. Lomoth\*

Department of Chemistry, Ångström Laboratory, Uppsala University, Box 523, 75120 Uppsala, Sweden, E-mail: reiner.lomoth@kemi.uu.se.

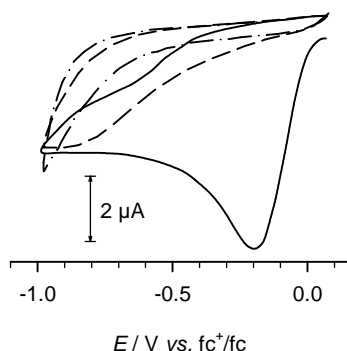

**Figure S-1.** Cyclic voltammograms ( $0.2 \text{ Vs}^{-1}$ ) of  $\text{NO}_2\text{-Ph-N}_2^+$  (0.5 mM in acetonitrile with 0.1 M TBAPF<sub>6</sub>) on Pt electrode (diam.: 2 mm), scans 1 (—), 2 (---) and 3 (-•-).

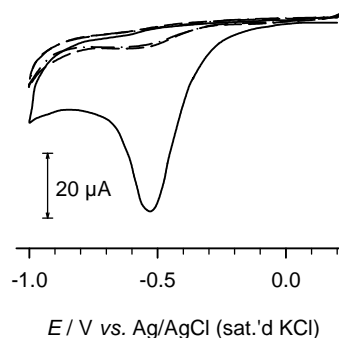

**Figure S-2.** Cyclic voltammograms ( $0.2 \text{ Vs}^{-1}$ ) of a  $\text{NO}_2\text{-Ph}$ -modified glassy carbon electrode (diam.: 3 mm) in 0.25 M  $\text{H}_2\text{SO}_4$ , scans 1 (—), 2 (---) and 3 (-•-).

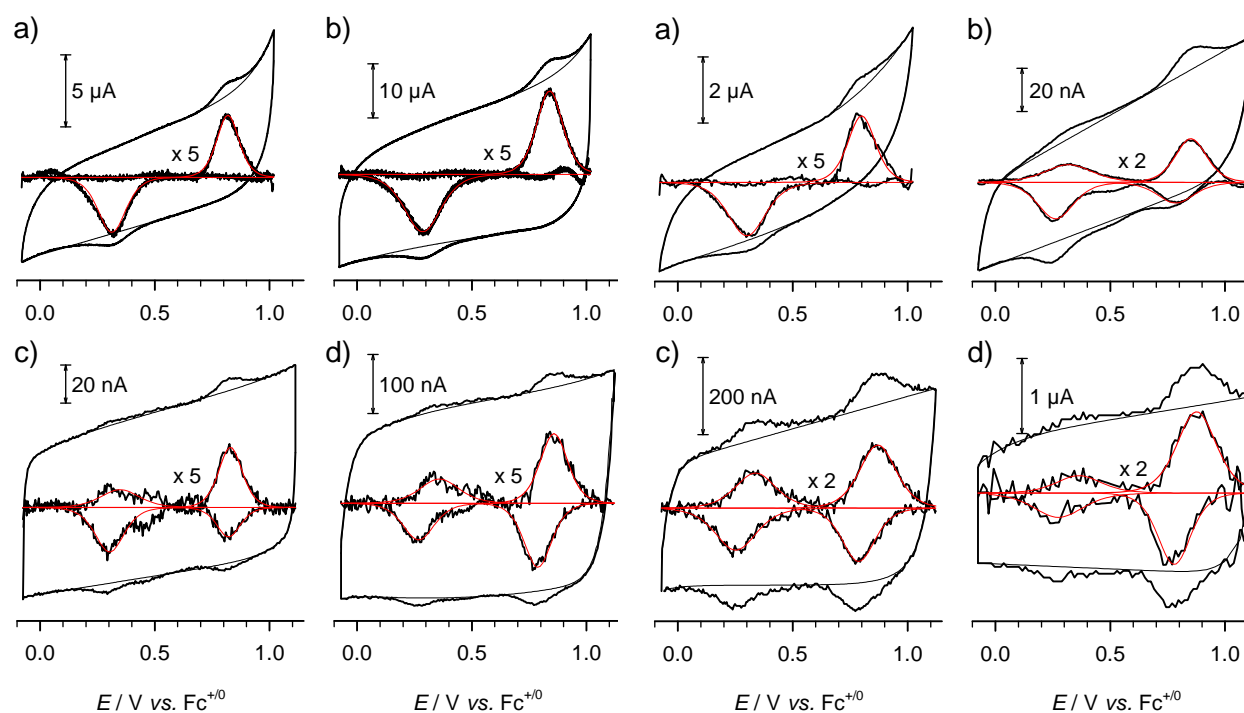

**Figure S-3.** Cyclic voltammograms of Pt electrodes (electrode diam.: 2 mm (a), 25 μm (b-d)) modified by grafting of  $\text{N}_2^+\text{-Ph-NO}_2$ ,  $\text{-NO}_2$  to  $\text{-NH}_2$  reduction, and subsequent amide coupling of complex **2**. Capacitive background (thin lines) and faradaic peaks (red) fitted to background subtracted current. Scan rate:  $5 \text{ Vs}^{-1}$  (a),  $20 \text{ Vs}^{-1}$  (b),  $500 \text{ Vs}^{-1}$  (c),  $2000 \text{ Vs}^{-1}$  (d).

**Figure S-4.** Cyclic voltammograms of Pt electrodes (electrode diam.: 2 mm (a, b), 25 μm (c-d)) modified by grafting of  $\text{N}_2^+\text{-Ph-COOH}$  and subsequent amide coupling of complex **1**. Capacitive background (thin lines) and faradaic peaks (red) fitted to background subtracted current. Scan rate:  $2 \text{ Vs}^{-1}$  (a),  $200 \text{ Vs}^{-1}$  (b),  $2000 \text{ Vs}^{-1}$  (c),  $10000 \text{ Vs}^{-1}$  (d).

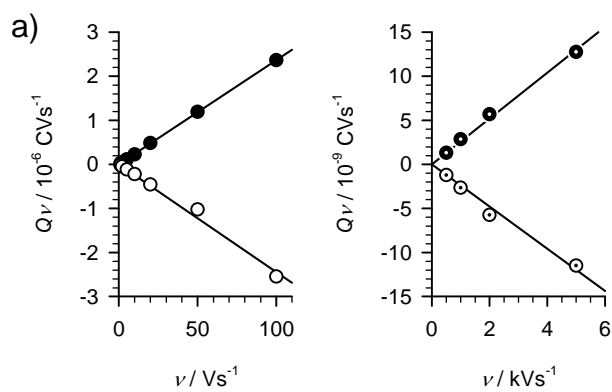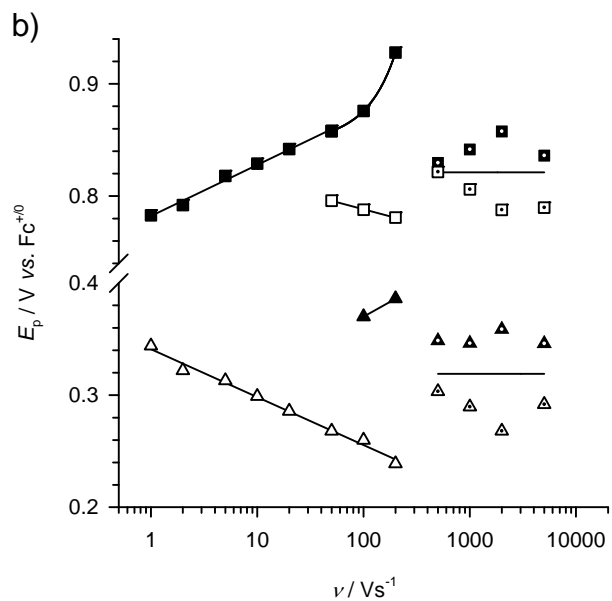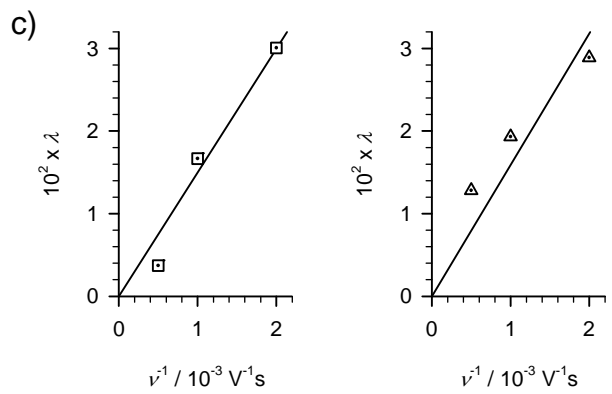

**Figure S-5.** Scan rate dependent CV parameters of Pt electrodes (2 mm diam. and 25  $\mu\text{m}$  diam. (dotted symbols)) modified by grafting of  $\text{N}_2^+$ -Ph- $\text{NO}_2$ , - $\text{NO}_2$  to - $\text{NH}_2$  reduction, and subsequent amide coupling of complex **2**. (a) Total anodic (●) and cathodic (○) peak. (b) Peak potentials of the  $\text{Ru}^{\text{III/II}}(\text{N}_6)$  (■, □) and  $\text{Ru}^{\text{III/II}}(\text{N}_5\text{O})$  (▲, △) couples. (c). Kinetic parameters obtained from reverse/forward peak current ratios  $i_{\text{pc}}(\text{N}_6)/i_{\text{pa}}(\text{N}_6)$  (□) and  $i_{\text{pa}}(\text{N}_5\text{O})/i_{\text{pc}}(\text{N}_5\text{O})$  (△).

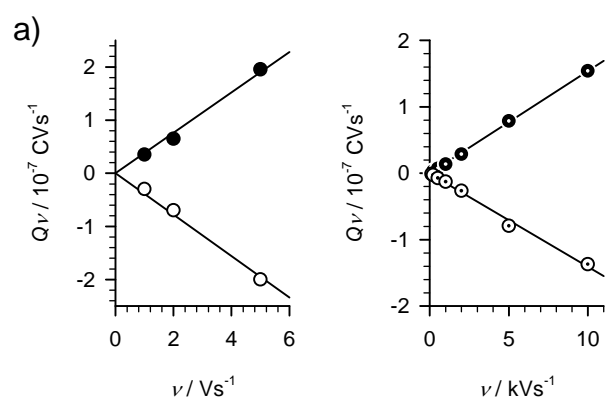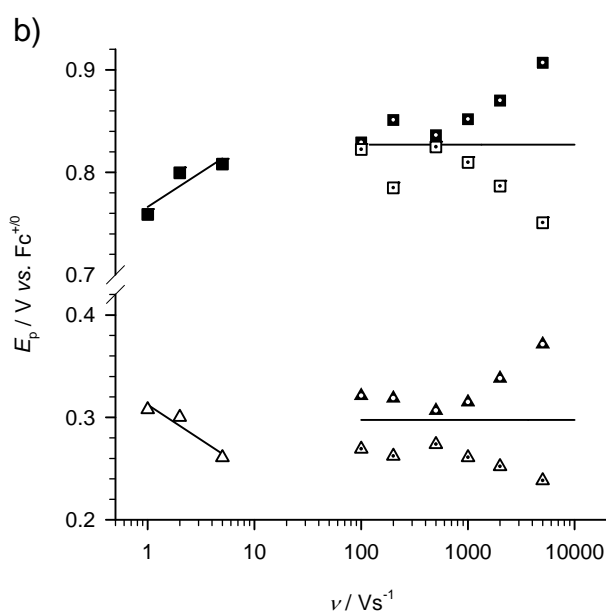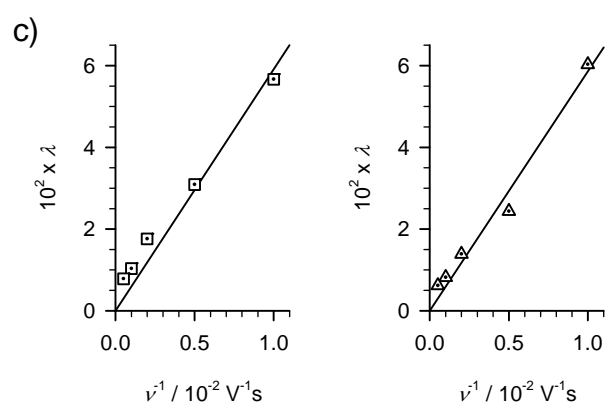

**Figure S-6.** Scan rate dependent CV parameters of Pt electrodes (2 mm diam. and 25  $\mu\text{m}$  diam. (dotted symbols)) modified by grafting of  $\text{N}_2^+$ -Ph-COOH and subsequent amide coupling of complex **1**. (a) Total anodic (●) and cathodic (○) peak. (b) Peak potentials of the  $\text{Ru}^{\text{III/II}}(\text{N}_6)$  (■, □) and  $\text{Ru}^{\text{III/II}}(\text{N}_5\text{O})$  (▲, △) couples. (c). Kinetic parameters obtained from reverse/forward peak current ratios  $i_{\text{pc}}(\text{N}_6)/i_{\text{pa}}(\text{N}_6)$  (□) and  $i_{\text{pa}}(\text{N}_5\text{O})/i_{\text{pc}}(\text{N}_5\text{O})$  (△).
